# Supplementary material
Source: MDPI journal article supplement (https://www.mdpi.com/1424-8247/15/5/621)
Supplement: s1 [file s1]

## **SUPPLEMENTARY INFORMATION**

### **Methylene Blue Is a Nonspecific Protein-Protein Interaction Inhibitor with Potential for Repurposing as an Antiviral for COVID-19**

Sung-Ting Chuang<sup>1</sup>, Henrietta Papp<sup>2,3</sup>, Anett Kuczmog<sup>2,3</sup>, Rebecca Eells<sup>4</sup>, Jose M. Condor Capcha<sup>5,6</sup>, Lina  
A. Shehadeh<sup>5,6</sup>, Ferenc Jakab<sup>2,3</sup>, and Peter Buchwald<sup>\*1,7</sup>

<sup>1</sup>Diabetes Research Institute, <sup>5</sup>Division of Cardiology, <sup>6</sup>Interdisciplinary Stem Cell Institute, and  
<sup>7</sup>Department of Molecular and Cellular Pharmacology, Miller School of Medicine, University of Miami,  
Miami, Florida, USA

<sup>2</sup>National Laboratory of Virology and <sup>3</sup>Institute of Biology, Faculty of Sciences, University of Pécs, Pécs,  
Hungary

<sup>4</sup>Reaction Biology, Malvern, PA, USA

## Supplementary Figures

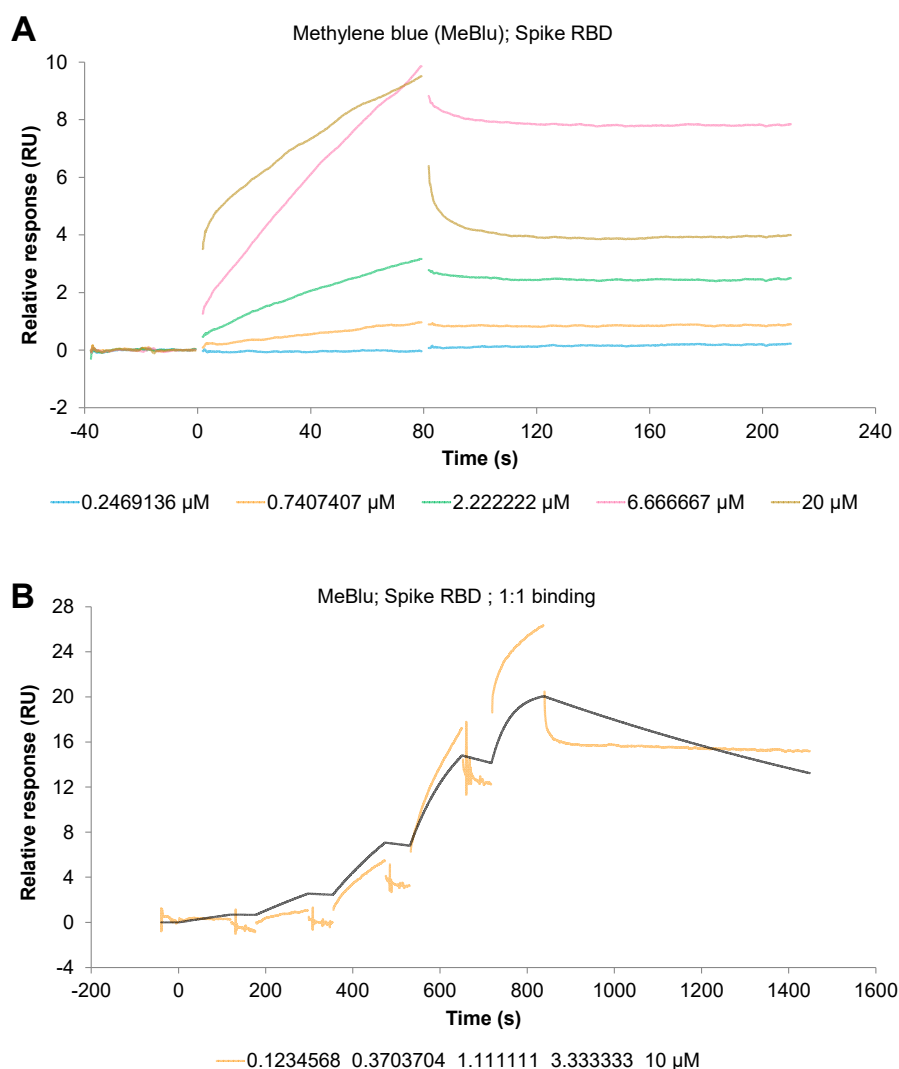

**Figure S1. Binding of MeBlu to SARS-CoV-2 spike RBD as assessed via surface plasmon resonance (SPR).** Multi- (A) and single- (B) cycle kinetics were used to measure binding to the SARS-CoV-2 spike RBD using a Biacore 8K instrument with a series S CM5 sensor chip (Cytiva) as described in the Methods. Initially a multi-cycle kinetic measurement was performed, however, the signals clearly did not return to baseline over the dissociation period and a regeneration condition was not established to ensure removal of all previously bound molecule before the injection of the next concentration. As a result, there were a decreasing number of binding sites available over the course of the measurement as sites became blocked by the preceding concentration(s), which meant this approach was not appropriate to use for a quantitative analysis even though qualitatively it was clear that binding was occurring. To deal with the apparent slow dissociation (signal not returning to baseline between injections) a single cycle kinetic approach was used instead. Data indicate low-micromolar binding; however, the binding behavior could

not be described well with a 1:1 binding interactions, thus preventing a quantitative analysis to determine the on/off-rate and/or  $K_D$  values. Figure B shows an example of this deviation from 1:1 binding where the colored (yellow) curve is the measured data while the black curve is the fit curve produced using a 1:1 binding model. Instead, the SPR data provides qualitative support that MeBlu interacts with SARS-CoV-2 spike RBD.
